# Supplementary material for: Glutamate Concentration in the Medial Prefrontal Cortex Predicts Resting-State Cortical-Subcortical Functional Connectivity in Humans
Source: PubMed Central journal article supplement (PMC3616113; doi:10.1371/journal.pone.0060312), 2013-04-03
Supplement: pone.0060312.s001.pdf [file pone.0060312.s001.pdf]

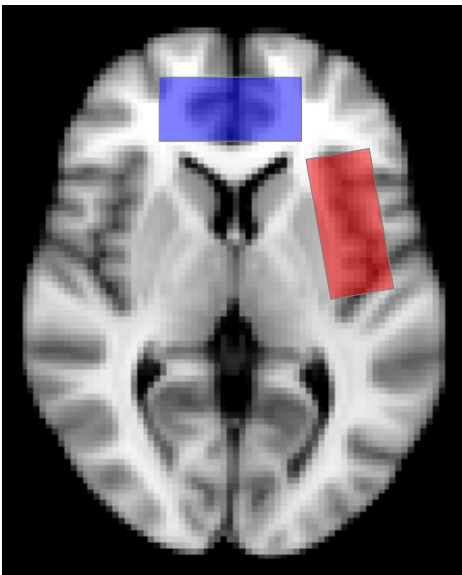

Supplementary figure 1A: mPFC (blue) and left insula (red) MRS voxel locations shown on the MNI template.

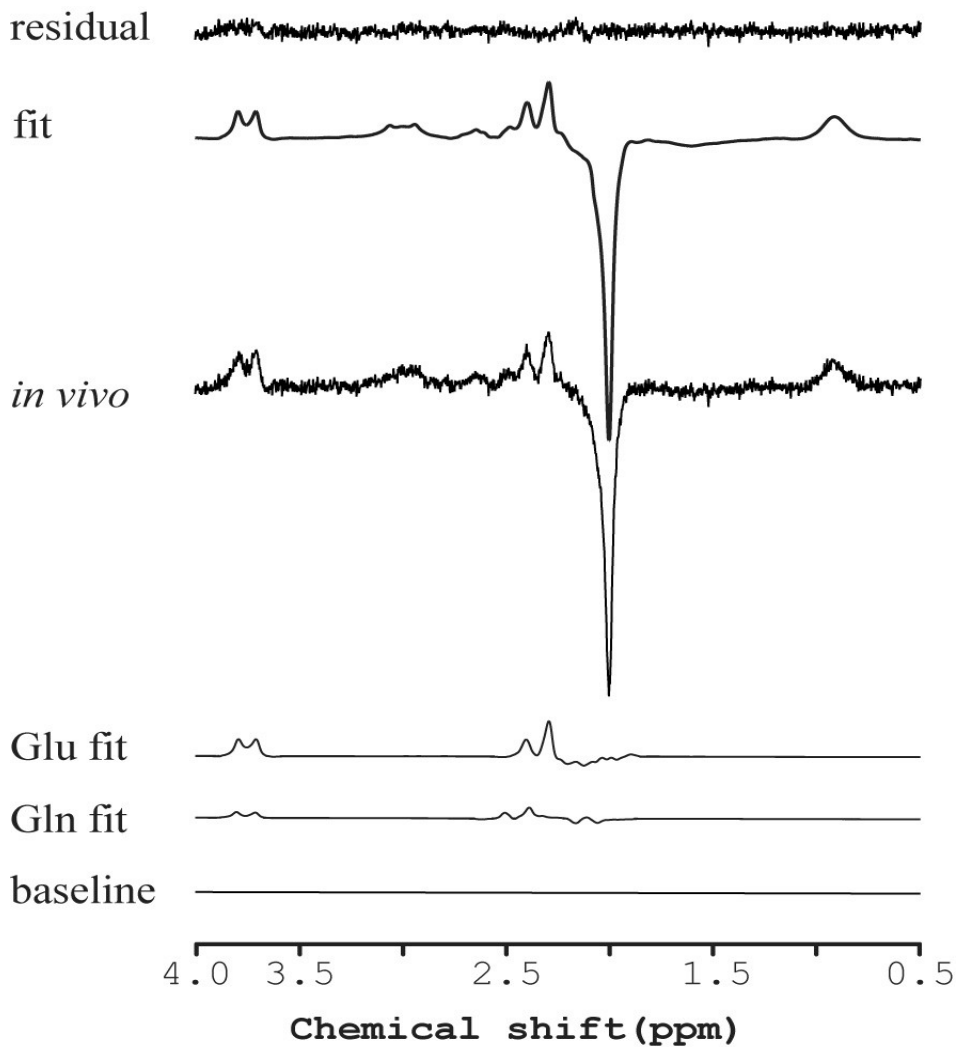

Supplementary figure 1B: LCMoDel quantification of the representative 1H NMR spectrum obtained using MEGA-PRESS sequence from a 48 x 21 x 21 mm<sup>3</sup> voxel placed in the mPFC region of the human brain. The contribution of Glu and Gln are shown.
