# Supplementary material for: Glutamate Concentration in the Medial Prefrontal Cortex Predicts Resting-State Cortical-Subcortical Functional Connectivity in Humans
Source: PubMed Central journal article supplement (PMC3616113; doi:10.1371/journal.pone.0060312), 2013-04-03
Supplement: pone.0060312.s003.pdf [file pone.0060312.s003.pdf]

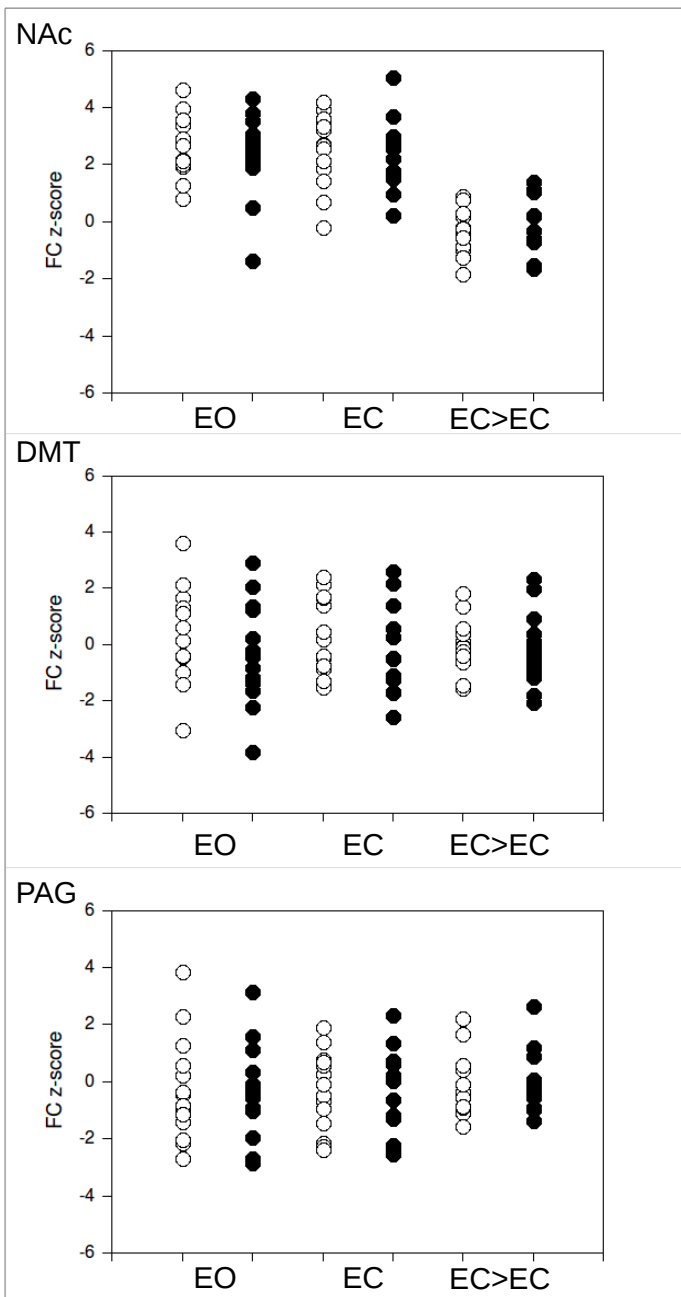

Supplementary figure 3: Distribution of mPFC to target FC z-scores for each region. Each point represents one subject. Unfilled circles = left hemisphere, filled circles = right hemisphere.
