# Supplementary material for: Glutamate Concentration in the Medial Prefrontal Cortex Predicts Resting-State Cortical-Subcortical Functional Connectivity in Humans
Source: PubMed Central journal article supplement (PMC3616113; doi:10.1371/journal.pone.0060312), 2013-04-03
Supplement: pone.0060312.s004.pdf [file pone.0060312.s004.pdf]

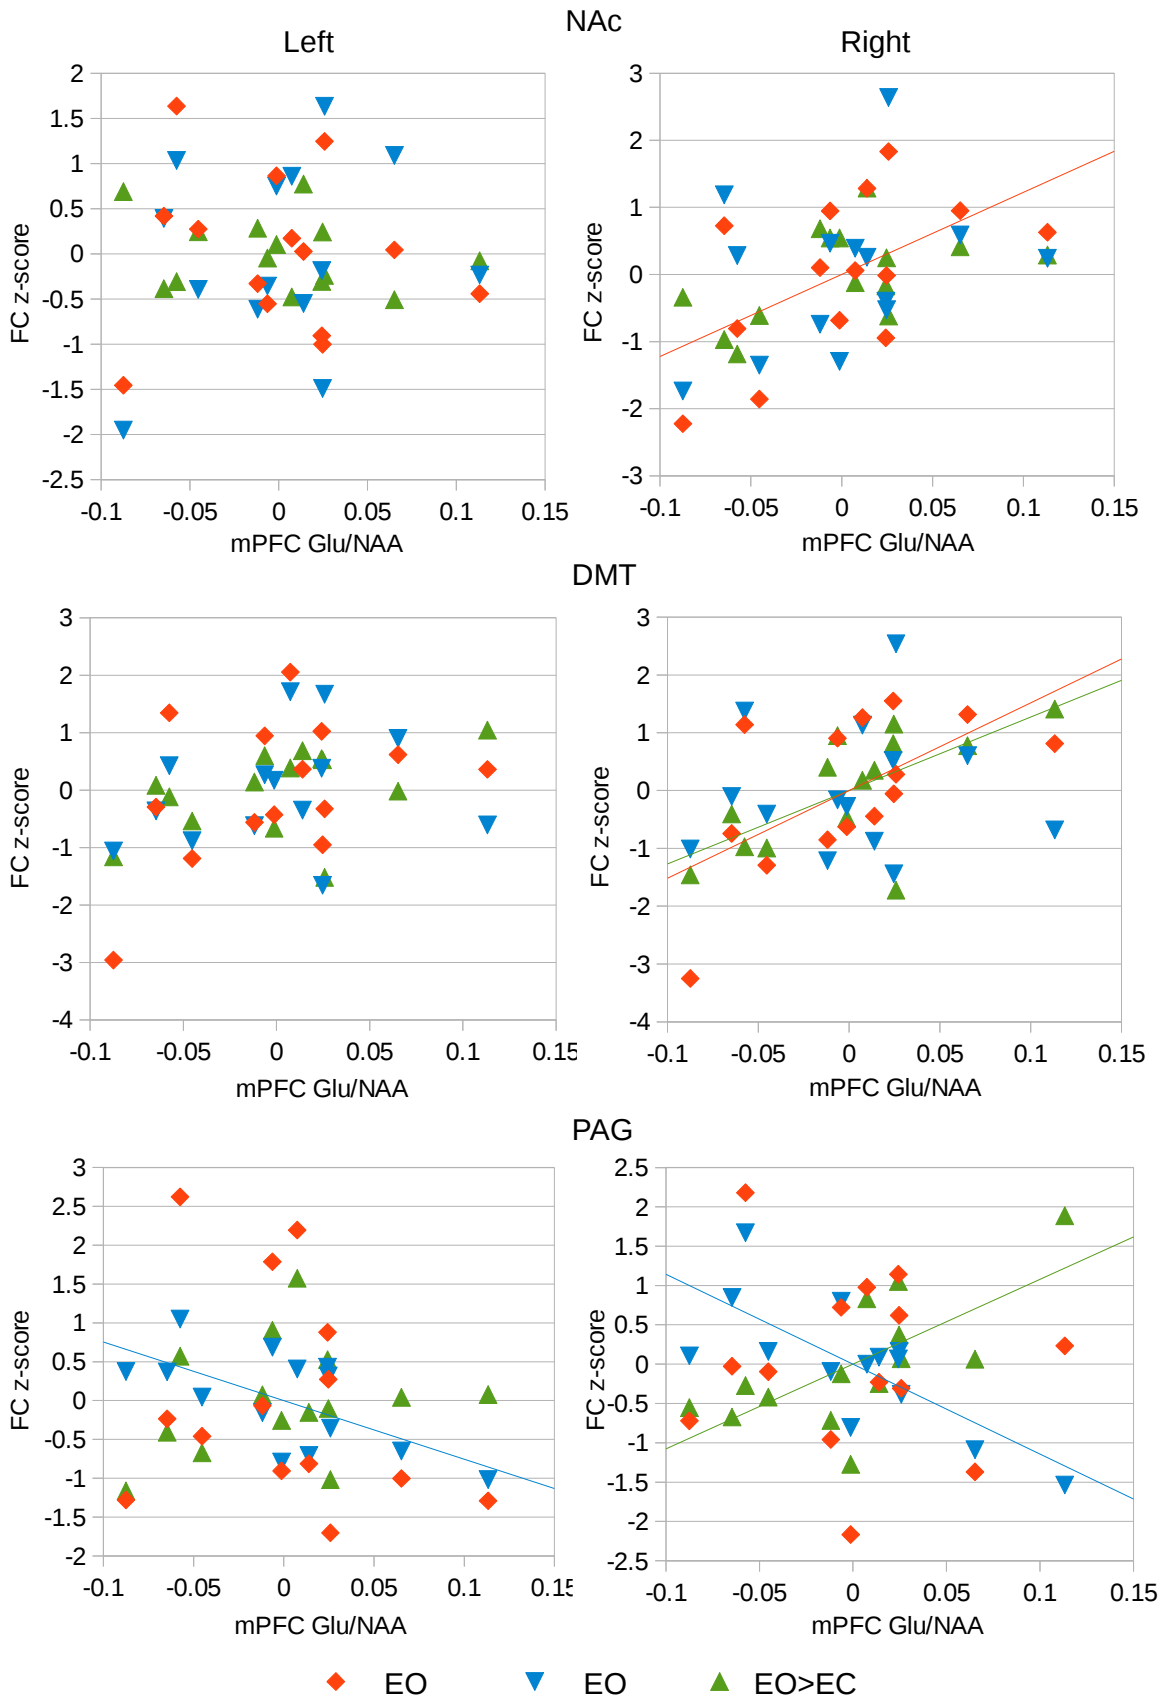

Supplementary figure 4a: Scatter plots for FC for all regions vs mPFC Glu/NAA in EO, EC and EO>EC conditions. Note that values are residuals following the removal of confounding variables.

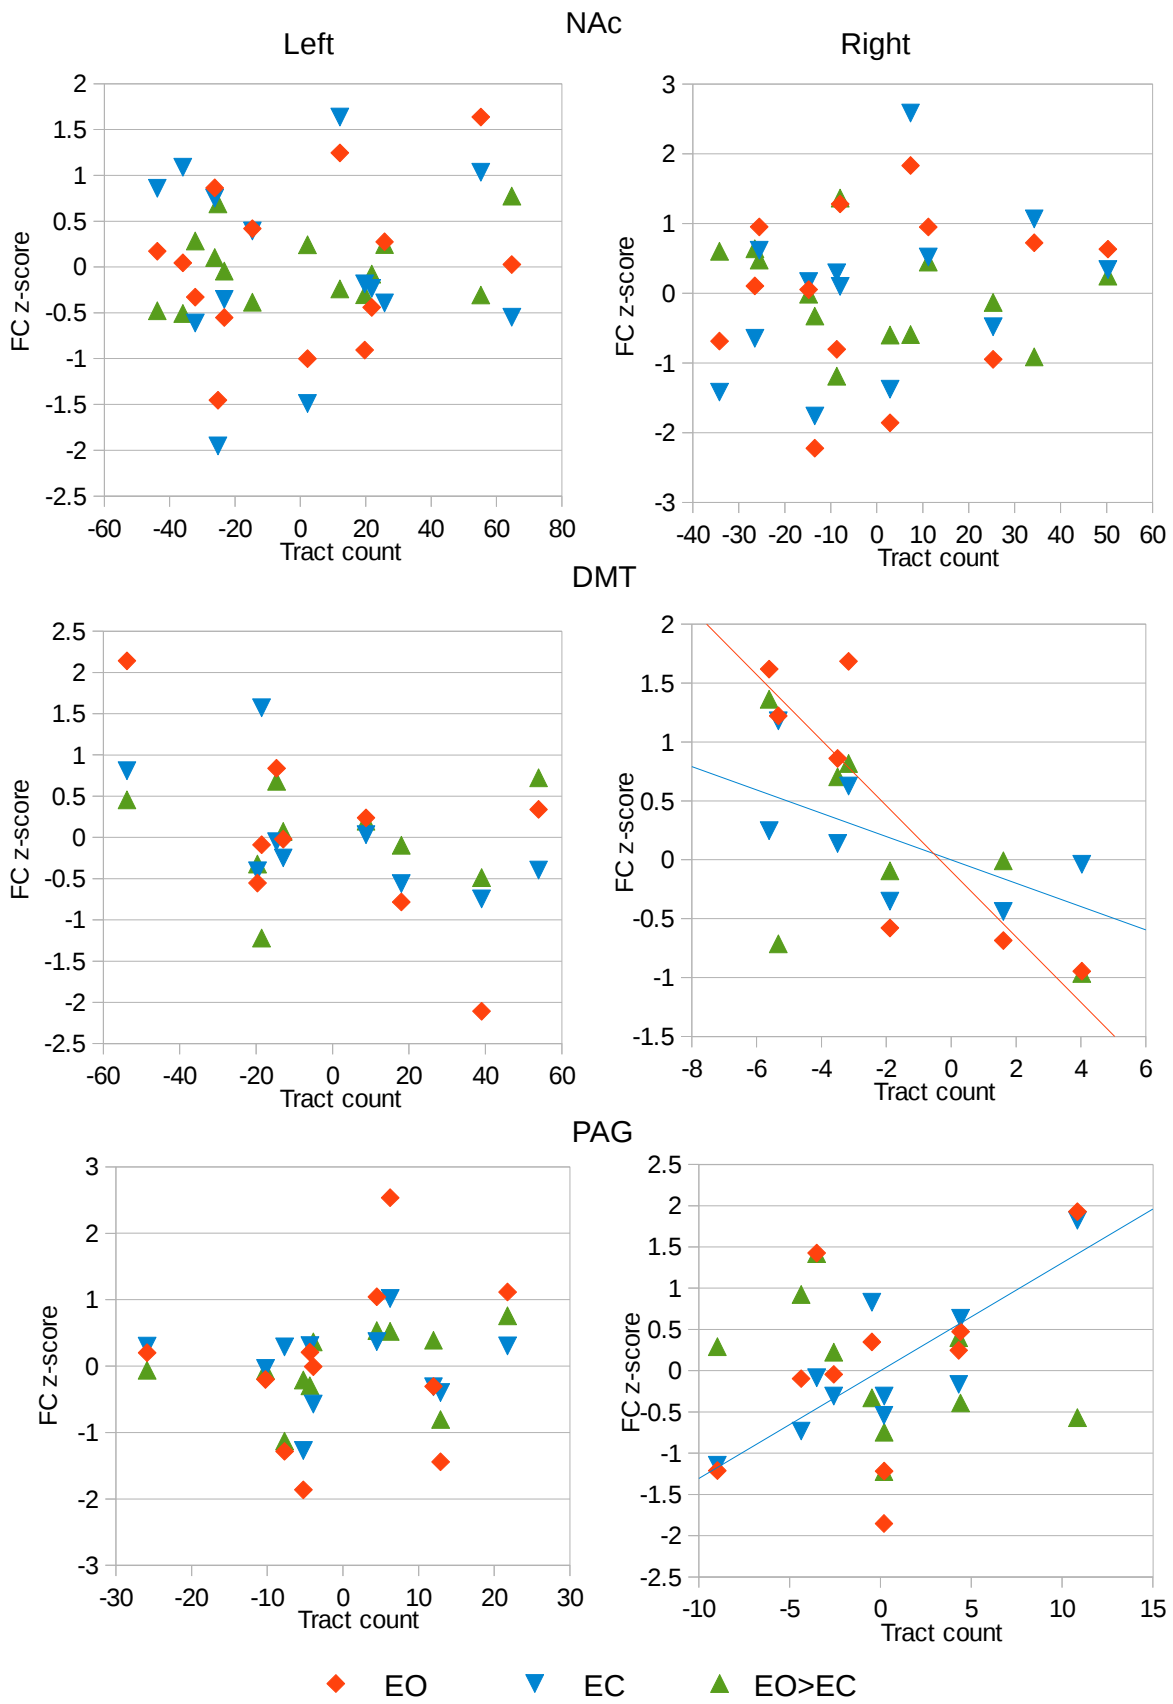

Supplementary figure 4b: Scatter plots for FC for all regions vs tract count in EO, EC and EO>EC conditions. Note that values are residuals following the removal of confounding variables.
