# Supplementary material for: Glutamate Concentration in the Medial Prefrontal Cortex Predicts Resting-State Cortical-Subcortical Functional Connectivity in Humans
Source: PubMed Central journal article supplement (PMC3616113; doi:10.1371/journal.pone.0060312), 2013-04-03
Supplement: pone.0060312.s005.pdf [file pone.0060312.s005.pdf]

| subject      | mPFC            |                 |                 | Left insula     |                 |                 |
|--------------|-----------------|-----------------|-----------------|-----------------|-----------------|-----------------|
|              | Glx/NAA         | Glu/NAA         | Gln/NAA         | Glx/NAA         | Glu/NAA         | Gln/NAA         |
| 1            | 0.884 [3]       | 0.625 [5]       | 0.259 [16]      | 0.911 [3]       | 0.692 [5]       | 0.219 [18]      |
| 2            | 0.953 [3]       | 0.736 [4]       | 0.216 [18]      | 0.952 [1]       | 0.715 [2]       | 0.237 [8]       |
| 3            | 0.974 [2]       | 0.734 [3]       | 0.240 [10]      | 0.920 [2]       | 0.719 [3]       | 0.201 [11]      |
| 4            | 0.927 [3]       | 0.709 [4]       | 0.218 [13]      | 0.914 [2]       | 0.734 [4]       | 0.180 [17]      |
| 5            | 0.949 [2]       | 0.729 [3]       | 0.220 [12]      | 0.860 [2]       | 0.654 [3]       | 0.206 [9]       |
| 6            | 1.056 [2]       | 0.762 [4]       | 0.293 [11]      | 0.727 [3]       | 0.597 [3]       | 0.130 [17]      |
| 7            | 0.915 [2]       | 0.738 [3]       | 0.177 [16]      | 0.750 [2]       | 0.569 [3]       | 0.181 [11]      |
| 8            | 1.065 [2]       | 0.740 [3]       | 0.325 [7]       | 0.952 [3]       | 0.675 [4]       | 0.277 [12]      |
| 9            | 0.925 [3]       | 0.617 [9]       | 0.308 [9]       | 0.815 [3]       | 0.627 [3]       | 0.188 [12]      |
| 10           | 1.045 [3]       | 0.815 [5]       | 0.230 [20]      | 0.829 [2]       | 0.656 [3]       | 0.173 [12]      |
| 11           | 0.913 [2]       | 0.627 [4]       | 0.286 [12]      | 0.835 [3]       | 0.650 [4]       | 0.185 [16]      |
| 12           | 1.086 [2]       | 0.782 [3]       | 0.304 [10]      | 0.921 [2]       | 0.716 [3]       | 0.205 [11]      |
| 13           | 0.893 [2]       | 0.718 [3]       | 0.175 [13]      | 0.987 [2]       | 0.719 [4]       | 0.268 [13]      |
| Mean<br>(SD) | 0.968<br>(0.07) | 0.718<br>(0.06) | 0.250<br>(0.05) | 0.875<br>(0.08) | 0.671<br>(0.05) | 0.204<br>(0.04) |

Supplementary table 1: MRS values for mPFC and left insula. Metabolite concentrations in relation to NAA are given. Cramér-Rao lower bounds (%SD) for Glx, Glu, and Gln are shown in square brackets.
