# Supplementary material for: Glutamate Concentration in the Medial Prefrontal Cortex Predicts Resting-State Cortical-Subcortical Functional Connectivity in Humans
Source: PubMed Central journal article supplement (PMC3616113; doi:10.1371/journal.pone.0060312), 2013-04-03
Supplement: pone.0060312.s006.pdf [file pone.0060312.s006.pdf]

|       | mPFC<br>Gln/NAA | Insula<br>Glu/NAA | mPFC<br>Gln/NAA | Insula<br>Glu/NAA |
|-------|-----------------|-------------------|-----------------|-------------------|
|       | <b>L NAc</b>    |                   | <b>R NAc</b>    |                   |
| EO    | 0.25(0.40)      | 0.23 (0.41)       | 0.05 (0.86)     | 0.14 (0.61)       |
| EC    | 0.37 (0.20)     | 0.4 (0.15)        | 0.05 (0.84)     | 0.4 (0.15)        |
| EO>EC | -0.01 (0.97)    | -0.63<br>(0.015)* | 0.16 (0.61)     | -0.55<br>(0.038)* |
|       | <b>L DMT</b>    |                   | <b>R DMT</b>    |                   |
| EO    | -0.1 (0.72)     | 0.08 (0.78)       | -0.09 (0.75)    | 0.08 (0.79)       |
| EC    | 0.14 (0.64)     | 0.23 (0.42)       | 0.15 (0.61)     | 0.31 (0.27)       |
| EO>EC | -0.29 (0.3)     | -0.13 (0.65)      | -0.19 (0.51)    | -0.17 (0.56)      |
|       | <b>L PAG</b>    |                   | <b>R PAG</b>    |                   |
| EO    | 0.21 (0.48)     | 0.07 (0.8)        | 0.05 (0.85)     | -0.02 (0.94)      |
| EC    | 0.17 (0.54)     | 0.18 (0.54)       | 0.01 (0.99)     | 0.19 (0.51)       |
| EO>EC | 0.15 (0.6)      | 0.01 (0.97)       | 0.01 (0.97)     | -0.15 (0.6)       |

Supplementary table 2: Regional and biochemical specificity controls. Correlations between mPFC to target FC and mPFC Gln/NAA + left insula Glu/NAA.
